# Supplementary material
Source: MDPI journal article supplement (https://www.mdpi.com/2072-4292/7/10/13233)
Supplement: s1 [file s1]

*Remote Sens.* **2015**, *7*, 13233-13250; doi:10.3390/rs71013233

**OPEN ACCESS**

remote sensing

**ISSN 2072-4292**

www.mdpi.com/journal/remotesensing

Supplementary Information

Spatial and Temporal Patterns of Global NDVI Trends: Correlations with Climate and Human Factors. *Remote Sensing* 2015, *7*, 13233–13250

Ya Liu 1,2, Yan Li 1,2, Shuangcheng Li 1,2,* and Safa Motesharrei 3,4,5

1 College of Urban and Environmental Sciences, Peking University, Beijing 100871, China;
E-Mails: liuy_chenj2013@pku.edu.cn (Y.L.); yanli.geo@gmail.com (Y.L.)

2 Key Laboratory for Earth Surface Processes of Ministry of Education, Peking University,
Beijing 100871, China

3 The Institute for Physical Science Technology, University of Maryland, College Park,
MD 20742, USA; E-Mail: safa.motesharrei@gmail.com

4 Department of Physics, University of Maryland, College Park, MD 20742, USA

5 National Socio-Environmental Synthesis Center (SESYNC), Annapolis, MD 21401, USA

***** Authors to whom correspondence should be addressed; E-Mail: scli@urban.pku.edu.cn;
Tel.: +86-10-6276-7428.

Received: 27 March 2015 / Accepted: 26 September 2015 / Published: 6 October 2015

This supplemental materials support the main manuscript with tables (Table S1, S2 and S3).

**Table S1.** Regression analysis for NDVI trends and changes of climate variables in each period. ** Correlation is significant at the 0.01 level (2-tailed), *** Correlation is significant at the 0.001 level (2-tailed), omission = not significant, R2 = coefficient of determination.

| **Region** | **Polar Domain Region** | | **Humid Tropical Domain Region** | |
| --- | --- | --- | --- | --- |
| **Regression Model** | **R2** | **Regression Model** | **R2** |
| 1982–1994 | NDVI = 0.148***T + 0.106***P | 0.035 | NDVI = 0.199***T + 0.280***P | 0.126 |
| 1995–2004 | NDVI = −0.219***T − 0.04P | 0.053 | NDVI = 0.146***T + 0.149P | 0.049 |
| 2005–2012 | NDVI = 0.239***T − 0.86***P | 0.065 | NDVI = 0.131***T + 0.247***P | 0.089 |
| **Region** | **Dry Domain Region** | | **Humid Temperate Domain Region** | |
|  | **Regression Model** | **R2** | **Regression Model** | **R2** |
| 1982–1994 | NDVI = 0.392***T + 0.312***P | 0.254 | NDVI = 0.318***T + 0.033P | 0.103 |
| 1995–2004 | NDVI = 0.146***T + 0.181***P | 0.061 | NDVI = 0.101***T + 0.080***P | 0.018 |
| 2005–2012 | NDVI = −0.375***T + 0.417***P | 0.324 | NDVI = 0.069***T + 0.229***P | 0.057 |

**Table S2.** Results of correlation analysis between magnitude of NDVI trends and the global human footprint (log10) in each continent for the period 1995–2004 and the whole time span 1982–2012. R is the coefficient of Pearson correlation and P is its significance.

| **Continents** |  | **1995**–**2004** | | | **1982**–**2012** | | |
| --- | --- | --- | --- | --- | --- | --- | --- |
| **GHF** | **NDVI Trend**  **(×10−3)** | **R** | **P** | **NDVI Trend**  **(×10−3)** | **R** | **P** |
| Africa | 15.552 | −1.205 | 0.200 | 0.132 | 0.235 | 0.437 | 0.001 |
| Asia | 15.804 | −0.421 | 0.222 | 0.107 | 0.408 | 0.547 | 0.000 |
| Europe | 28.633 | −0.287 | 0.066 | 0.646 | 1.141 | 0.410 | 0.003 |
| Oceania | 8.078 | −0.629 | 0.375 | 0.285 | 0.421 | 0.169 | 0.641 |
| North America | 12.691 | 0.249 | −0.195 | 0.268 | 0.352 | −0.147 | 0.423 |
| South America | 16.95 | −1.302 | −0.197 | 0.481 | 0.444 | −0.172 | 0.540 |

**Table S3.** The percentage of pixels with significant NDVI trend and the comparison between the average of significant NDVI trends and the average NDVI trend of all pixels in each Bailey’s Ecoregion.

| **Regions** | **Epochs** | **Percentage**  **(%)** | **Average of Significant NDVI Trends (×10–3)** | **Average NDVI Trend of all Pixels (×10–3)** |
| --- | --- | --- | --- | --- |
| Dry Domain Region | 1982–1994 | 17.45 | 0.652 | 0.728 |
| 1995–2004 | 11.92 | −0.413 | −0.423 |
| 2005–2012 | 16.65 | 1.007 | 1.567 |
| Humid Temperate Domain Region | 1982–1994 | 17.81 | 1.621 | 1.396 |
| 1995–2004 | 12.51 | −0.717 | −1.067 |
| 2005–2012 | 10.16 | 2.347 | 2.618 |
| Humid Tropical Domain Region | 1982–1994 | 10.81 | −0.197 | −0.203 |
| 1995–2004 | 11.22 | −1.189 | −1.294 |
| 2005–2012 | 10.40 | −0.337 | −0.385 |
| Polar Domain Region | 1982–1994 | 13.00 | 0.841 | 0.876 |
| 1995–2004 | 16.30 | −0.028 | −0.077 |
| 2005–2012 | 13.31 | 4.046 | 4.765 |

© 2015 by the authors; licensee MDPI, Basel, Switzerland. This article is an open access article distributed under the terms and conditions of the Creative Commons Attribution license (http://creativecommons.org/licenses/by/4.0/).
